# Supplementary material for: Topology is the Principal Determinant in the Folding of a Complex All-alpha Greek Key Death Domain from Human FADD
Source: PubMed Central journal article supplement (PMC2724026; doi:10.1016/j.jmb.2009.04.004), 2009-06-05
Supplement: mmc1.pdf [file mmc1.pdf]

## Supplementary Material for:

Topology is the principle determinant in the folding of a complex all-alpha Greek key Death Domain from Human FADD

Annette Steward, Gary McDowell and Jane Clarke

### (1) $\Phi$ -values in the individual helices

The  $\Phi$ -values obtained are thus generally classified into low, medium and high classes: in this case the cut-offs used are: low,  $\Phi \leq 0.15$ ; medium,  $\Phi = 0.16-0.5$ ; high,  $\Phi \geq 0.51$ .

*Helix 1* has an a-symmetrical pattern of core  $\Phi$ -values. Most  $\Phi$ -values, for both core and Ala-Gly scanning mutants are medium indicating that H1 is partially folded in the TS; an exception is V103A which packs into the B1 core which has a  $\Phi$ -value of zero.

*Helix 2* has medium  $\Phi$ -values for core and secondary structure mutants, except for L119 towards the C-terminus, which has a low core  $\Phi$ -value (central core).

*Helix 3*, all  $\Phi$ -values are zero. This helix is evidently essentially unstructured in the TS.

*Helix 4* has an a-symmetrical pattern of core  $\Phi$ -values. It has high  $\Phi$ -values at the N-terminus, for both secondary and tertiary structure; towards the C-terminus, the Ala-Gly scanning  $\Phi$ -values are medium, those of the core residues are low or zero. The helix seems to be more structured at the N-terminus than the C-terminus in the TS.

*Helix 5* shows medium  $\Phi$ -values for all positions. The core  $\Phi$ -values reduce as they move from the N- to the C-terminus. A  $\Phi$ -value could not be obtained for C168A at the C-terminus of helix 5 as the  $\Delta\Delta G_{D,N}$  value was below the cut-off of 0.6 kcal mol<sup>-1</sup>.

*Helix 6* shows a mixture of low and medium  $\Phi$ -values. The Ala-Gly  $\Phi$ -values suggest that the protein is more helical at the centre of the helix than the ends and the core  $\Phi$ -values are higher towards the N-terminus than towards the C-terminus. The  $\Delta\Delta G_{D,N}$  was too low for V180A to obtain a  $\Phi$ -value.

## Figure Legends:

**Supplementary Figure 1:** Chevron plots for all core mutants. The plots for each helix are shown separately. The data in open symbols were excluded from the linear fits.

**Supplementary Figure 2:** Chevron plots for all surface mutants. The plots for each helix are shown separately. The Ala mutant is shown as a circle and the Gly mutant as a diamond. The same colour is used for mutants of the same residue. The  $\Phi$ -values were determined by comparing the Ala and Gly mutations at each position. The data in open symbols were excluded from the linear fits.

**Supplementary Figure 3:** A comparison of free energy of unfolding,  $\Delta G_{D,N}$ , calculated from equilibrium and kinetic data at 2 M urea. The dashed line indicates a slope of 1. (a)  $\Delta G_{kin}$  determined using chevron plots with linear unfolding limbs (points that clearly deviate from a linear fit have been removed, see text and Supplementary Figures 1 & 2). (b)  $\Delta G_{kin}$  determined using “Hammond” fits, all data points included, solid line is a linear fit of all points, slope = 1.06, R = 0.94. The values are generally in good agreement but the equilibrium value is consistently around 10% higher than the kinetic value where linear fits are used (a). This probably arises from uncertainties in estimating  $k_u$ , in particular where there is curvature in the unfolding limbs of the chevron plot. Where a Hammond fit is used the agreement between kinetic and equilibrium free energies is good (b).

**Supplementary Figure 4:** Comparison of  $\Phi$ -values from linear and “Hammond” fits of the data. There is no significant difference.

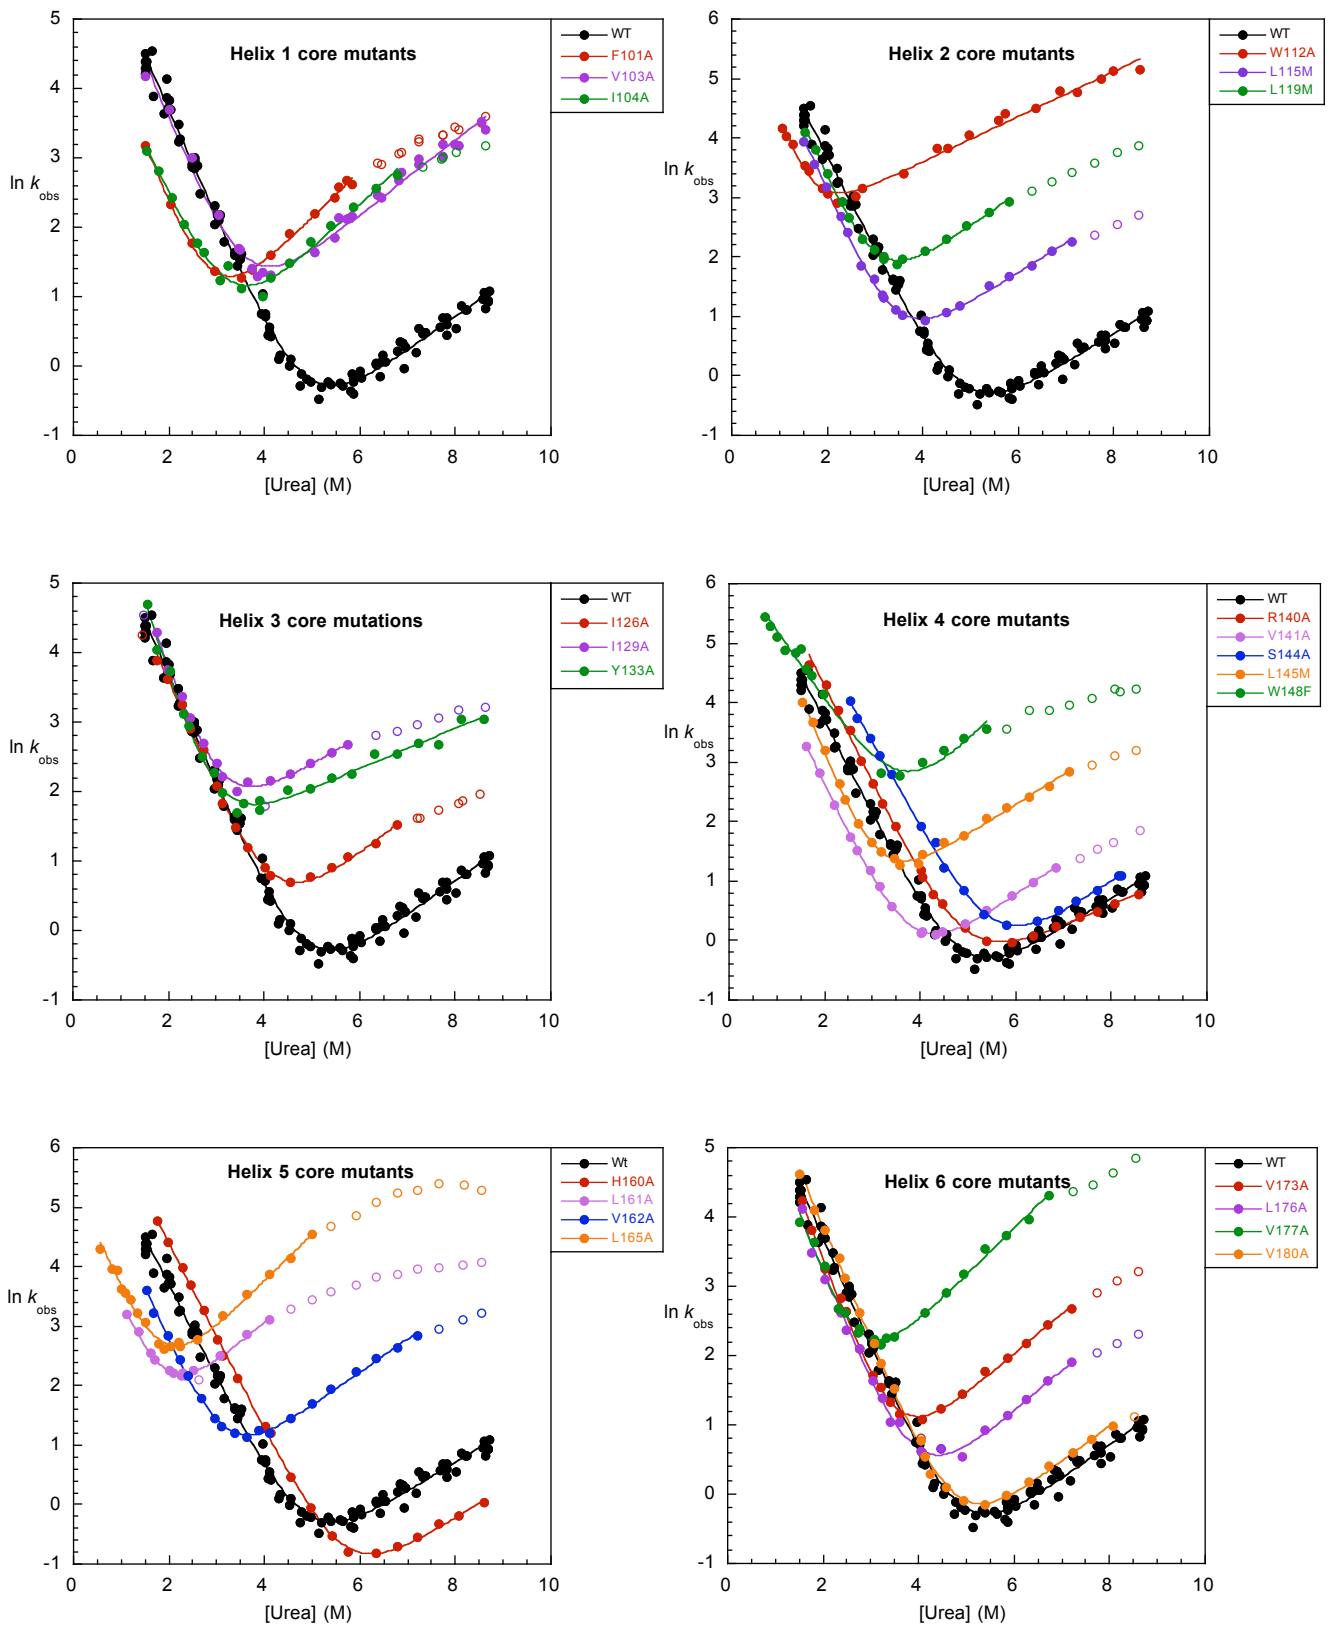

*Supplementary Figure 1*

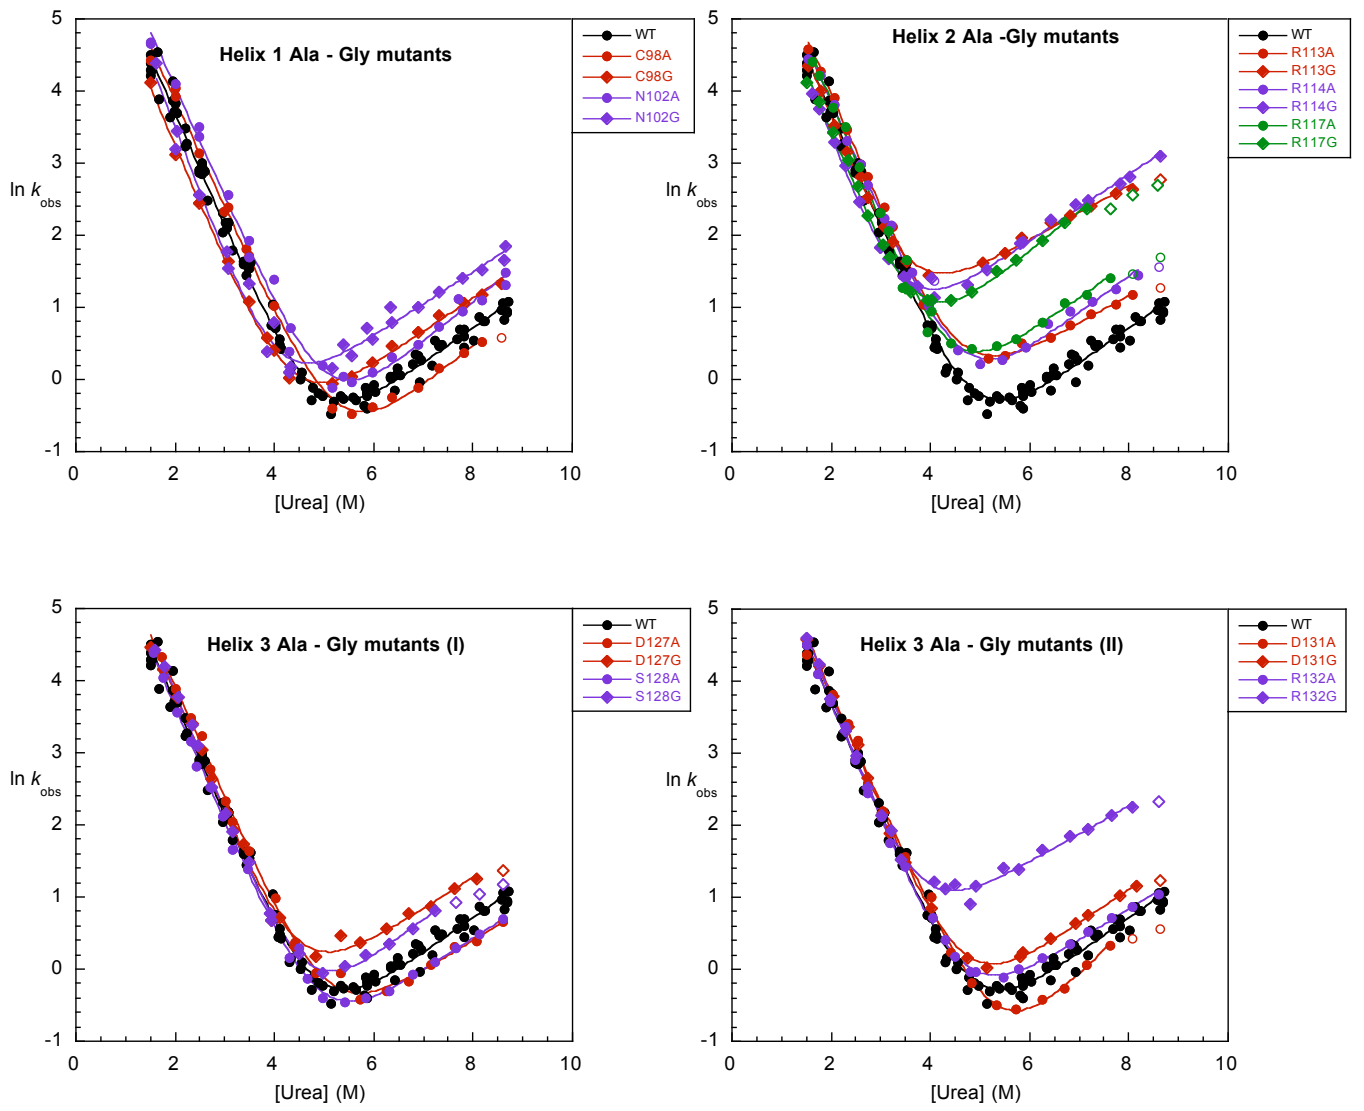

*Supplementary Figure 2*

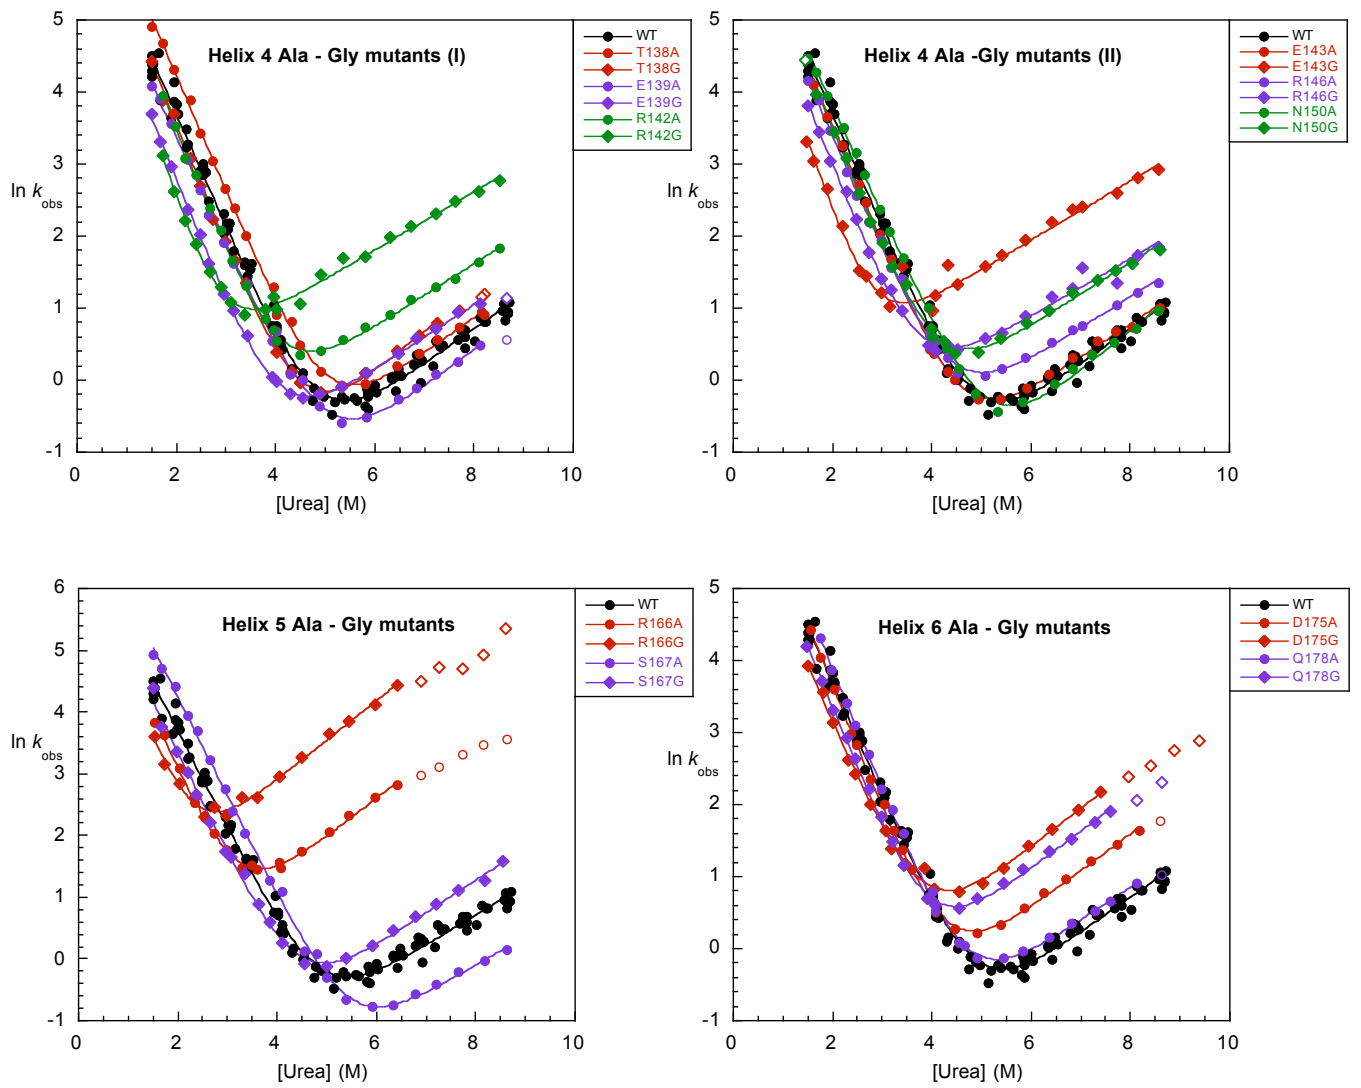

*Supplementary Figure 2 contd.*

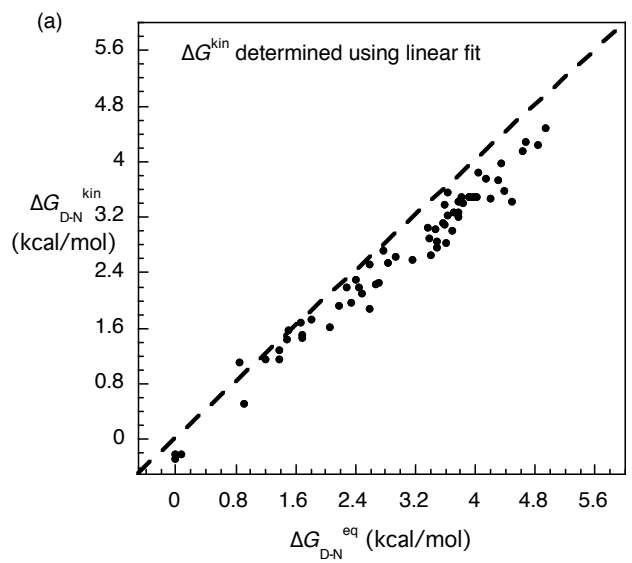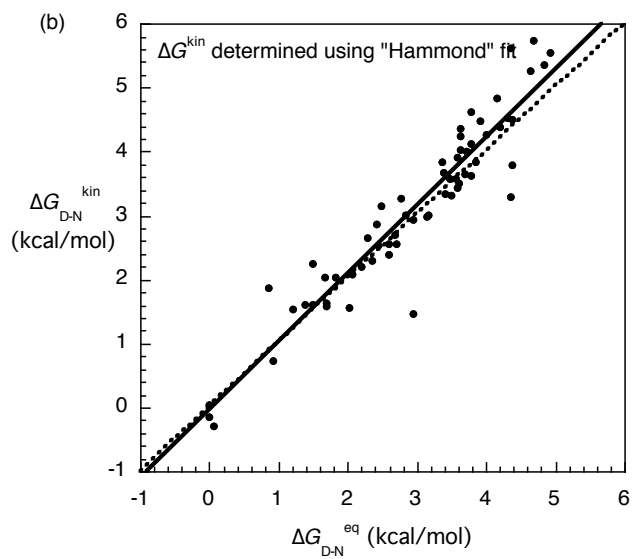

*Supplementary Figure 3*

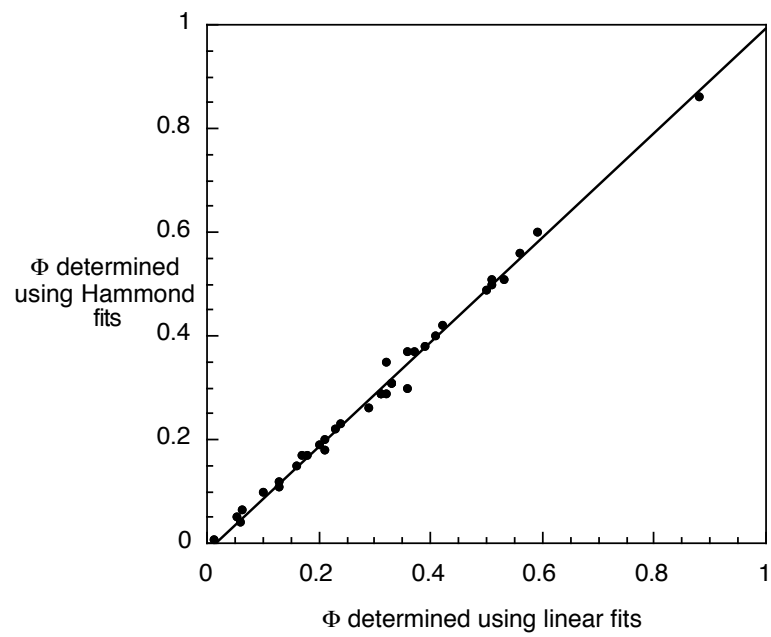

*Supplementary Figure 4*
